# Supplementary material for: Quantitative capabilities of STXM to measure spatially resolved organic volume fractions of mixed organic ∕ inorganic particles
Source: Copernicus journal article supplement (doi:10.5194/amt-12-1619-2019), 2019-03-12
Supplement: Supplementary file 2 [file amt-12-1619-2019-supplement.zip]

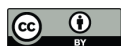

## *Supplement of*

# **Quantitative capabilities of STXM to measure spatially resolved organic volume fractions of mixed organic / inorganic particles**

**Matthew Fraund et al.**

*Correspondence to:* Ryan C. Moffet ([rmoffet@sonomatech.com](mailto:rmoffet@sonomatech.com))

- `amt-12-1619-2019-supplement-title-page.pdf`
- `.gitattributes`
- `AlignStack.m`
- `BeamtimeSummaryPlots.m`
- `CNOeleMaps.m`
- `CalciumMaps.m`
- `CarbonMapsSuppFigs.m`
- `DirLabelOrgVolFrac.m`
- `ExtractVararginValue.m`
- `FTMatrixShift.m`
- `FindingTotGradAngle.m`
- `LoadStackRawMulti.m`
- `MergingRawSTXMData.m`
- `MixingState.m`
- `MixingStatesforGUI.m`
- `NitrogenMaps.m`
- `OdStack.m`
- `OxygenMaps.m`
- `ParticleSize.m`
- `PotassiumMaps.m`

- PreToPostRatioVolFrac.m
- ReadHdrMulti.m
- RemoveHorizStreaks\_STXM.m
- STACKLab.fig
- STACKLab.m
- STXM\_GUIv2.m
- SimpleStats.m
- SingStackProcMixingStateOutputNOFIGS.m
- SulfurMaps.m
- Supplemental for Fraund STXM Standards with Organic Volume Fraction Calculation\_Final.pdf
- TestingBeersLaw.m
- TotalSphericity.m
- dftregistration.m
- energytest.m
- export\_fig
  - ImageSelection.class
  - ImageSelection.java
  - LICENSE
  - README.md
  - append\_pdfs.m
  - copyfig.m
  - crop\_borders.m
  - eps2pdf.m
  - export\_fig.m
  - fix\_lines.m
  - ghostscript.m
  - im2gif.m
  - isolate\_axes.m
  - pdf2eps.m
  - pdftops.m
  - print2array.m
  - print2eps.m
  - read\_write\_entire\_textfile.m
  - user\_string.m
  - using\_hg2.m
- extractingmfracGUI.m
- makinbinmap.m

- multihdrsplot.m
- removeoutlier\_IQRtest.m
- sillystring.m
- stxmsort.m
- tight\_subplot.m
- uipickfiles.m

The copyright of individual parts of the supplement might differ from the CC BY 4.0 License.
